# Supplementary material for: A Theoretical Investigation on CO Oxidation by Single‐Atom Catalysts M1/γ‐Al2O3 (M=Pd, Fe, Co, and Ni)
Source: PubMed Central journal article supplement — ChemCatChem. 2017 Mar 16;9(7):1222–9. doi: 10.1002/cctc.201601713 (PMC5413816; doi:10.1002/cctc.201601713), 2017-03-16
Supplement: CCTC-9-1222-s001.pdf [file CCTC-9-1222-s001.pdf]

Heterogeneous & Homogeneous & Bio- & Nano-

# CHEM **CAT** CHEM

---

CATALYSIS

## Supporting Information

### **A Theoretical Investigation on CO Oxidation by Single-Atom Catalysts $M_1/\gamma\text{-Al}_2\text{O}_3$ ( $M = \text{Pd, Fe, Co, and Ni}$ )**

Tao Yang,<sup>[a, d]</sup> Ryoichi Fukuda,<sup>[a, d]</sup> Saburo Hosokawa,<sup>[b, d]</sup> Tsunehiro Tanaka,<sup>[b, d]</sup>  
Shigeyoshi Sakaki,<sup>\*, [c, d]</sup> and Masahiro Ehara<sup>\*, [a, d]</sup>

cctc\_201601713\_sm\_miscellaneous\_information.pdf

## Contents

- I. Geometries and Electronic Properties of  $M_1/Al_2O_3$  ( $M = Pd, Fe, Co, \text{ and } Ni$ )
- II. Geometries and Electronic Properties of Intermediate **2** of  $M_1/Al_2O_3$  ( $M = Pd, Fe, Co, \text{ and } Ni$ )
- III. Geometries and Electronic Properties of Intermediate **4** of  $M_1/Al_2O_3$  ( $M = Pd, Fe, Co, \text{ and } Ni$ )
- IV. Geometries of Transition State **5-TS** of  $M_1/Al_2O_3$  ( $M = Pd, Fe, Co, \text{ and } Ni$ )
- V. Geometries of Intermediate **6** of  $M_1/Al_2O_3$  ( $M = Pd, Fe, Co, \text{ and } Ni$ ).
- VI. Geometries and Electronic Properties of Intermediate **8** of  $M_1/Al_2O_3$  ( $M = Pd, Fe, Co, \text{ and } Ni$ )
- VII. Geometries and Electronic Properties of Intermediate **9** of  $M_1/Al_2O_3$  ( $M = Pd, Fe, Co, \text{ and } Ni$ )

## I. Geometries and Electronic Properties of $\text{Al}_2\text{O}_3$ and $\text{M}_1/\text{Al}_2\text{O}_3$ ( $\text{M} = \text{Pd}, \text{Fe}, \text{Co}, \text{and Ni}$ )

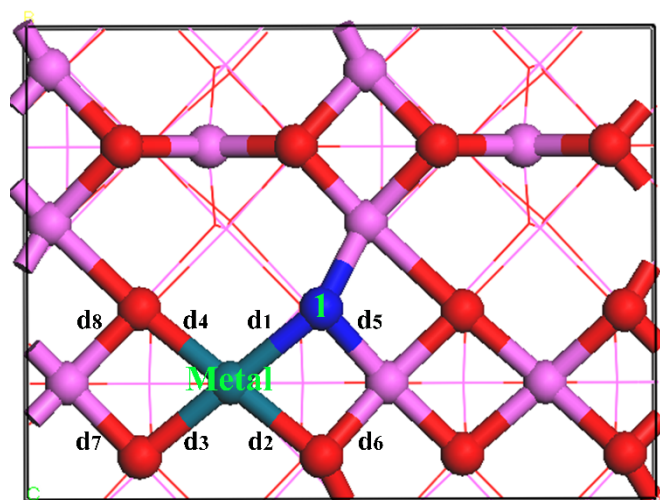

**Figure S1.** Geometries of  $\text{M}_1/\text{Al}_2\text{O}_3$  ( $\text{M} = \text{Pd}, \text{Fe}, \text{Co}, \text{and Ni}$ )

**Table S1.** Spin state and Bader charges of the metal atom (M) and lattice oxygen ( $\text{O}_1$ ) in  $\text{Al}_2\text{O}_3$  and  $\text{M}_1/\text{Al}_2\text{O}_3$  ( $\text{M} = \text{Pd}, \text{Fe}, \text{Co}, \text{and Ni}$ ).

| System                              | Spin State | Charge(M) | Charge( $\text{O}_1$ ) |
|-------------------------------------|------------|-----------|------------------------|
|                                     |            | e         | e                      |
| $\text{Al}_2\text{O}_3$             | 0          | +2.444    | -1.619                 |
| $\text{Pd}_1/\text{Al}_2\text{O}_3$ | 0.98       | +1.074    | -1.376                 |
| $\text{Fe}_1/\text{Al}_2\text{O}_3$ | 5.01       | +1.615    | -1.459                 |
| $\text{Co}_1/\text{Al}_2\text{O}_3$ | 4.07       | +1.538    | -1.421                 |
| $\text{Ni}_1/\text{Al}_2\text{O}_3$ | 1.10       | +1.234    | -1.427                 |

**Table S2.** Important bond distances in  $\text{Al}_2\text{O}_3$  and  $\text{M}_1/\text{Al}_2\text{O}_3$  ( $\text{M} = \text{Pd}, \text{Fe}, \text{Co}, \text{and Ni}$ ).

| System                              | $d_1$ | $d_2$ | $d_3$ | $d_4$ | $d_5$ | $d_6$ | $d_7$ | $d_8$ |
|-------------------------------------|-------|-------|-------|-------|-------|-------|-------|-------|
|                                     | Å     | Å     | Å     | Å     | Å     | Å     | Å     | Å     |
| $\text{Al}_2\text{O}_3$             | 1.949 | 1.949 | 1.981 | 1.981 | 1.836 | 1.836 | 1.846 | 1.846 |
| $\text{Pd}_1/\text{Al}_2\text{O}_3$ | 2.097 | 2.097 | 2.106 | 2.106 | 1.819 | 1.819 | 1.843 | 1.843 |
| $\text{Fe}_1/\text{Al}_2\text{O}_3$ | 2.028 | 2.028 | 2.115 | 2.115 | 1.837 | 1.837 | 1.847 | 1.847 |
| $\text{Co}_1/\text{Al}_2\text{O}_3$ | 1.906 | 2.080 | 1.912 | 2.385 | 1.867 | 1.812 | 1.850 | 1.822 |
| $\text{Ni}_1/\text{Al}_2\text{O}_3$ | 2.015 | 2.015 | 1.976 | 1.976 | 1.816 | 1.816 | 1.841 | 1.841 |

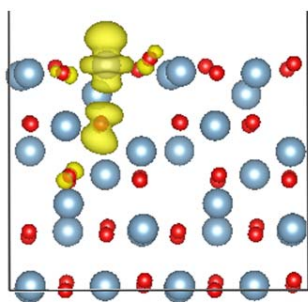

**Pd**

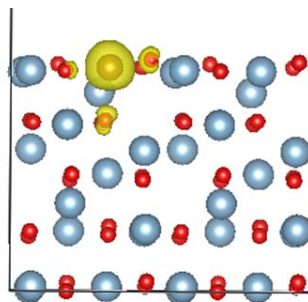

**Fe**

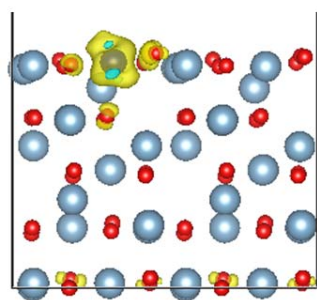

**Co**

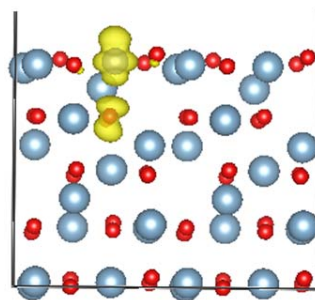

**Ni**

**Figure S2.** Spin density of M<sub>1</sub>/Al<sub>2</sub>O<sub>3</sub> (M = Pd, Fe, Co and Ni).

## II. Geometries and Electronic Properties of Intermediate 2 of $M_1/Al_2O_3$ ( $M = Pd, Fe, Co, \text{ and } Ni$ )

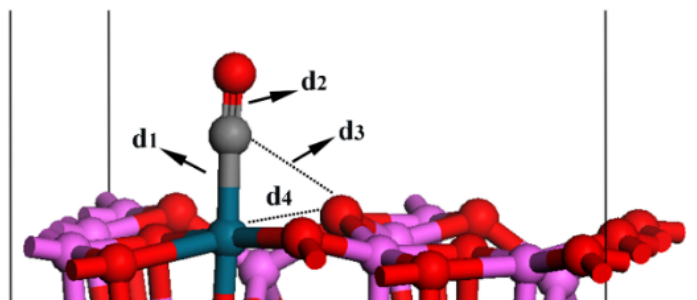

**Figure S3.** Geometries of intermediate 2 of  $M_1/Al_2O_3$  ( $M = Pd, Fe, Co, \text{ and } Ni$ )

**Table S3.** Spin state (S), Bader charges of the metal atom (M), lattice oxygen ( $O_{\text{lattice}}$ ), carbon (C) and oxygen ( $O_{\text{co}}$ ) of CO, bond distances in intermediate 2 (shown in Figure S3).

| System         | S    | M      | $O_{\text{lattice}}$ | C      | $O_{\text{co}}$ | $d_1$ | $d_2$ | $d_3$ | $d_4$ |
|----------------|------|--------|----------------------|--------|-----------------|-------|-------|-------|-------|
|                |      | e      | e                    | e      | e               | Å     | Å     | Å     | Å     |
| $Pd_1/Al_2O_3$ | 0.97 | +1.067 | -1.424               | +1.130 | -1.017          | 1.881 | 1.148 | 2.747 | 2.341 |
| $Fe_1/Al_2O_3$ | 4.89 | +1.621 | -1.464               | +1.098 | -1.084          | 2.282 | 1.142 | 2.758 | 2.104 |
| $Co_1/Al_2O_3$ | 0.00 | +1.261 | -1.416               | +1.046 | -1.059          | 1.750 | 1.153 | 2.615 | 2.059 |
| $Ni_1/Al_2O_3$ | 0.99 | +1.183 | -1.459               | +1.110 | -1.033          | 1.797 | 1.146 | 2.586 | 2.287 |

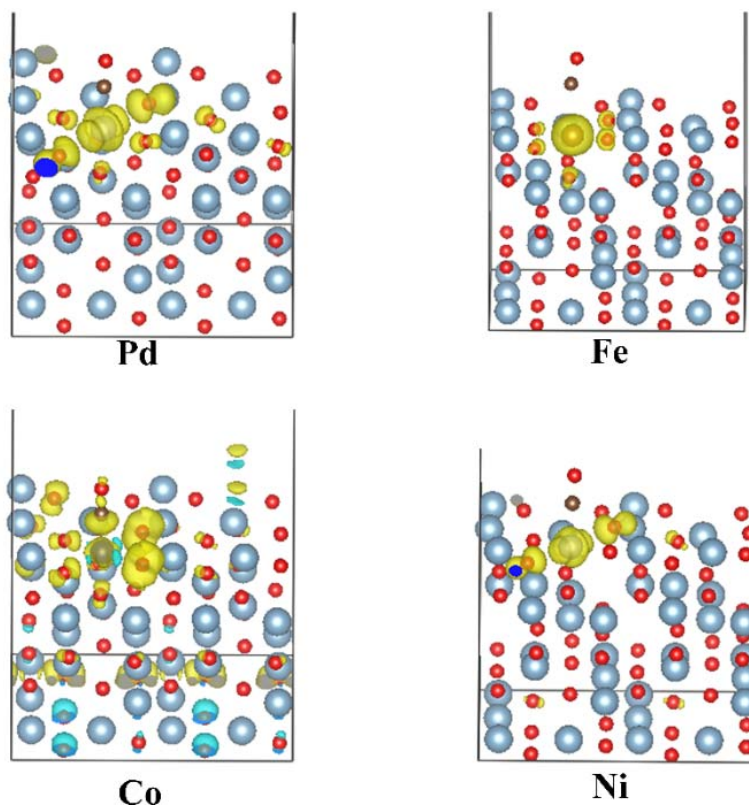

**Figure S4.** Spin density of intermediate 1 of  $M_1/Al_2O_3$  ( $M = Pd, Fe, Co \text{ and } Ni$ ). Antiferromagnetism

appears in intermediate **1** of  $\text{Co}_1/\text{Al}_2\text{O}_3$ .

The spin density of four single-atom catalysts are shown Figure R1. It is found that spin distribution maps of  $\text{Ni}_1/\text{Al}_2\text{O}_3$  and  $\text{Pd}_1/\text{Al}_2\text{O}_3$  are similar. As shown in Figure R2, the CO adsorption modifies the spin distribution of  $\text{Ni}_1/\text{Al}_2\text{O}_3$  and  $\text{Pd}_1/\text{Al}_2\text{O}_3$  and activates the surface O atom which has large spin density. For  $\text{Fe}_1/\text{Al}_2\text{O}_3$ , the weak interaction between CO and Fe doesn't affect the spin distribution. In the case of  $\text{Co}_1/\text{Al}_2\text{O}_3$ , the spin state is strongly influenced by the CO adsorption due to the strong interaction between CO and Co.

### III. Geometries and Electronic Properties of Intermediate 4 of $M_1/Al_2O_3$ ( $M = Pd, Fe, Co,$ and $Ni$ )

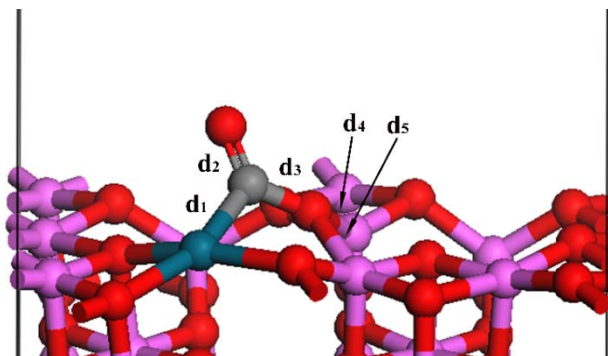

**Figure S5.** Geometries of intermediate **4** of  $M_1/Al_2O_3$  ( $M = Pd, Fe, Co,$  and  $Ni$ )

**Table S4.** Spin state (S), Bader charges of the metal atom (M), the active lattice oxygen atoms ( $O_{lattice}$ ), carbon atom (C) and oxygen atom ( $O_{co}$ ) of CO in intermediate **4**.

| System         | S    | M<br> e | $O_{lattice}$<br> e | C<br> e | $O_{co}$<br> e |
|----------------|------|---------|---------------------|---------|----------------|
| $Pd_1/Al_2O_3$ | 1.00 | +0.831  | -1.359              | +1.506  | -1.053         |
| $Fe_1/Al_2O_3$ | 3.00 | +1.307  | -1.347              | +1.304  | -1.074         |
| $Co_1/Al_2O_3$ | 2.00 | +1.138  | -1.323              | +1.427  | -1.055         |
| $Ni_1/Al_2O_3$ | 0.99 | +1.046  | -1.362              | +1.479  | -1.045         |

**Table S5.** Relevant distances of intermediate **4** shown in Figure S5.

| System         | $d_1$<br>Å | $d_2$<br>Å | $d_3$<br>Å | $d_4$<br>Å | $d_5$<br>Å |
|----------------|------------|------------|------------|------------|------------|
| $Pd_1/Al_2O_3$ | 1.923      | 1.205      | 1.353      | 1.866      | 1.946      |
| $Fe_1/Al_2O_3$ | 1.899      | 1.203      | 1.401      | 1.881      | 1.912      |
| $Co_1/Al_2O_3$ | 1.876      | 1.200      | 1.367      | 1.964      | 1.935      |
| $Ni_1/Al_2O_3$ | 1.852      | 1.202      | 1.351      | 1.873      | 1.931      |

#### IV. Geometries of Transition State 5TS of $M_1/Al_2O_3$ ( $M = Pd, Fe, Co, \text{ and } Ni$ )

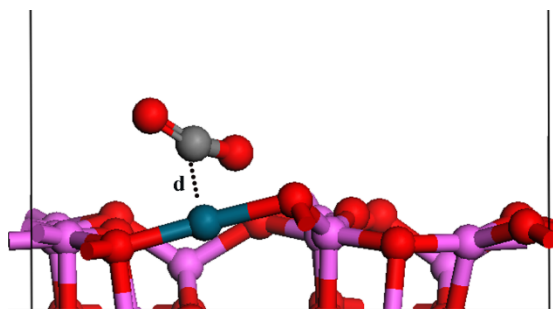

**Figure S6.** Geometries of transition state **5TS** of  $M_1/Al_2O_3$  ( $M = Pd, Fe, Co, \text{ and } Ni$ )

**Table S6.** The distance between the metal atom and carbon atom of  $CO_2$  in the transition state **5TS**.

| System         | d<br>Å |
|----------------|--------|
| $Pd_1/Al_2O_3$ | 2.324  |
| $Fe_1/Al_2O_3$ | 2.669  |
| $Co_1/Al_2O_3$ | 2.624  |
| $Ni_1/Al_2O_3$ | 1.852  |



V. Geometries of Intermediate 6 of  $M_1/Al_2O_3$  ( $M = Pd, Fe, Co, \text{ and } Ni$ )

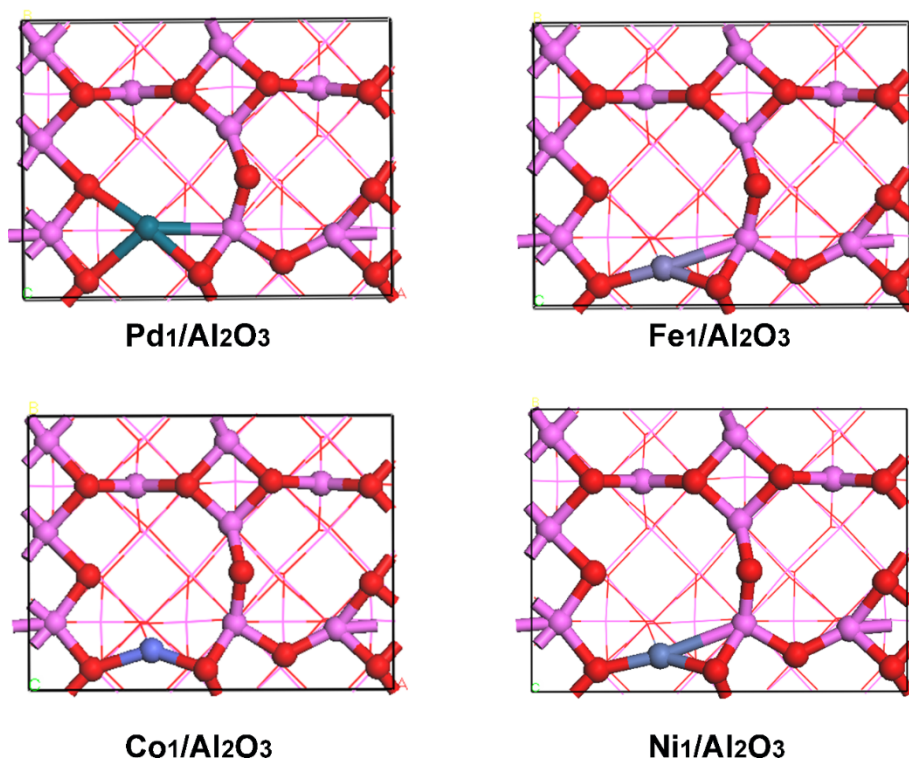

**Figure S7.** Geometries of intermediate **6** of  $M_1/Al_2O_3$  ( $M = Pd, Fe, Co, \text{ and } Ni$ ). The CO molecule has been omitted for clarity.

**VI. Geometries and Electronic Properties of Intermediate **8** of  $M_1/Al_2O_3$  ( $M = Pd, Fe, Co,$  and  $Ni$ )**

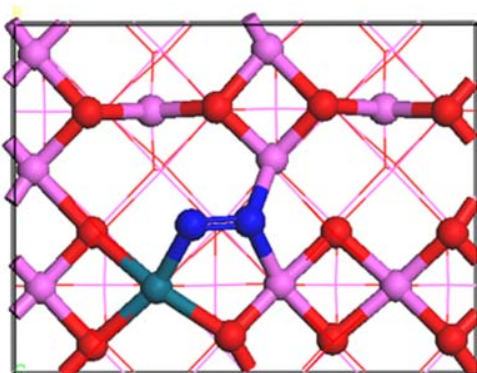

**Figure S8.** Geometries of intermediate **8** of  $M_1/Al_2O_3$  ( $M = Pd, Fe, Co,$  and  $Ni$ )

**Table S7.** Spin state (S), Bader charges of the metal atom (M) and adsorbed oxygen molecule ( $O_a$  and  $O_b$ ), and bond distances between metal atom and oxygen atom as well as between oxygen and oxygen atom in intermediate **8**.

| System         | S    | M<br> e | $O_a$<br> e | $O_b$<br> e | M-O distance<br>Å | O-O distance<br>Å |
|----------------|------|---------|-------------|-------------|-------------------|-------------------|
| $Pd_1/Al_2O_3$ | 0.89 | +1.034  | -0.326      | -0.879      | 1.909             | 1.449             |
| $Fe_1/Al_2O_3$ | 5.00 | +1.559  | -0.447      | -0.916      | 1.902             | 1.466             |
| $Co_1/Al_2O_3$ | 1.99 | +1.295  | -0.382      | -0.885      | 1.748             | 1.471             |
| $Ni_1/Al_2O_3$ | 1.02 | +1.200  | -0.368      | -0.882      | 1.800             | 1.450             |

Isolated O-O bond distance in  $O_2$  molecule: 1.236 Å

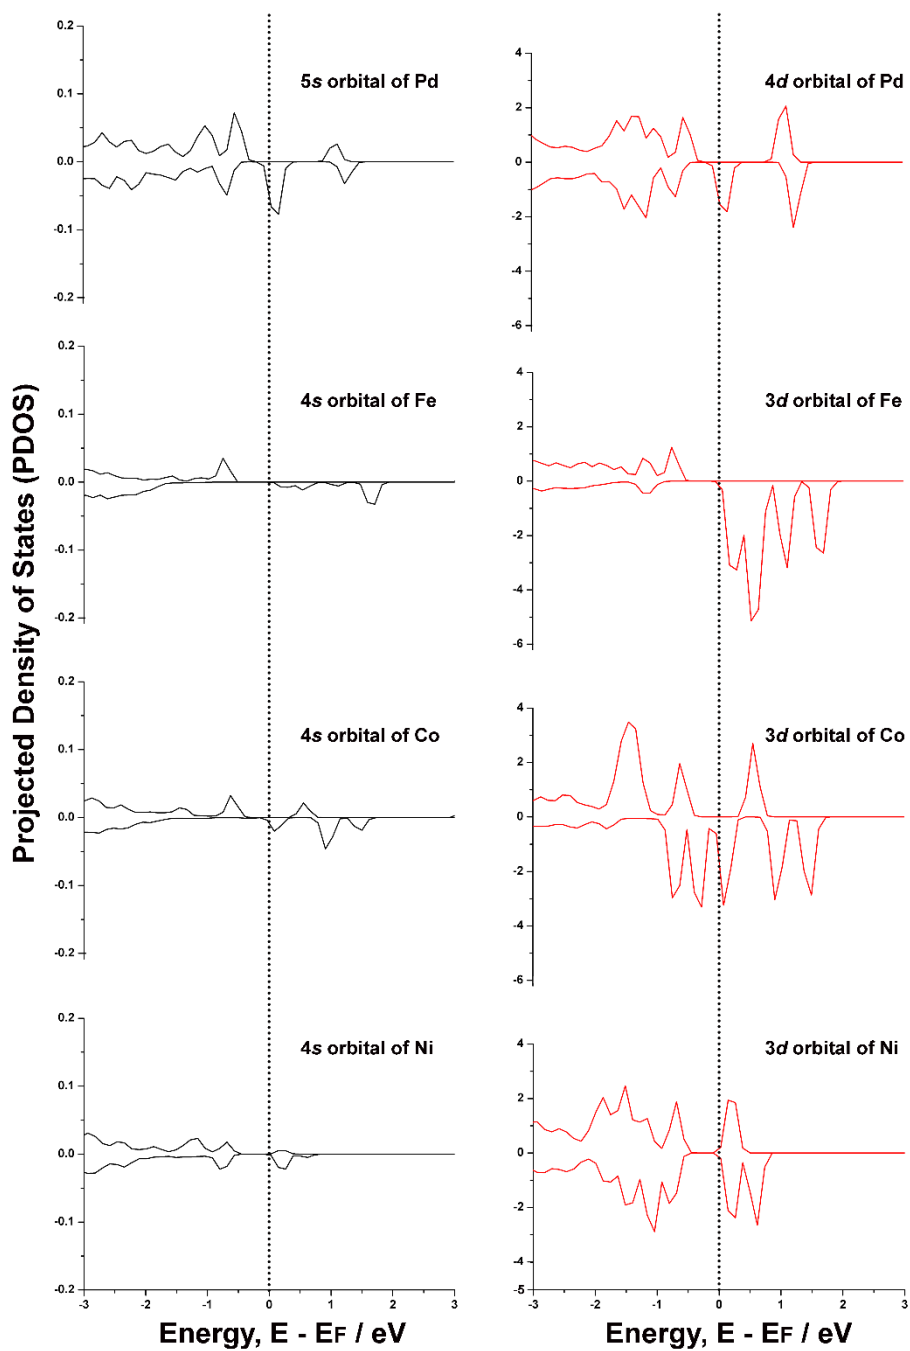

**Figure S9.** Calculated projected density of states (PDOS) for M-s orbital (left) and M-d orbital (right) of intermediate **8** of  $M_1/\text{Al}_2\text{O}_3$  (M = Pd, Fe, Co and Ni).

**VII. Geometries and Electronic Properties of Intermediate 9 of  $M_1/Al_2O_3$  ( $M = Pd, Fe, Co,$  and  $Ni$ )**

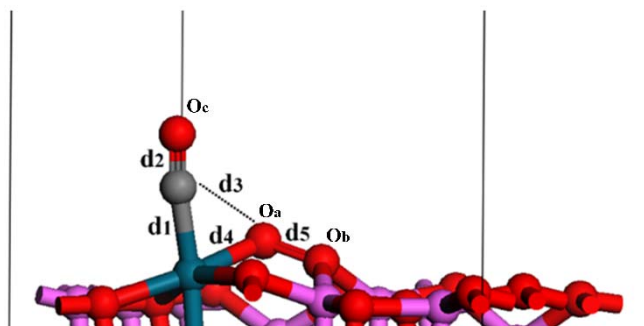

**Figure S10.** Geometries of intermediate **9** of  $M_1/Al_2O_3$  ( $M = Pd, Fe, Co,$  and  $Ni$ )

**Table S8.** Spin state (S), Bader charges of the metal atom (M), two adsorbed oxygen atoms ( $O_a$  and  $O_b$ ), carbon atom (C) and oxygen atom ( $O_c$ ) of CO atom in intermediate **9**.

| System         | S    | M<br> e | $O_a$<br> e | $O_b$<br> e | C<br> e | $O_c$<br> e |
|----------------|------|---------|-------------|-------------|---------|-------------|
| $Pd_1/Al_2O_3$ | 0.99 | +1.056  | -0.362      | -0.887      | +1.154  | -1.046      |
| $Fe_1/Al_2O_3$ | 2.99 | +1.387  | -0.329      | -0.886      | +1.045  | -1.072      |
| $Co_1/Al_2O_3$ | 1.78 | +1.224  | -0.325      | -0.855      | +1.071  | -1.058      |
| $Ni_1/Al_2O_3$ | 1.06 | +1.161  | -0.362      | -0.905      | +1.111  | -1.027      |

**Table S9.** Relevant distances in intermediate **9** shown in Figure S10.

| System         | $d_1$<br>Å | $d_2$<br>Å | $d_3$<br>Å | $d_4$<br>Å | $d_5$<br>Å |
|----------------|------------|------------|------------|------------|------------|
| $Pd_1/Al_2O_3$ | 1.906      | 1.148      | 2.560      | 1.983      | 1.443      |
| $Fe_1/Al_2O_3$ | 1.839      | 1.153      | 2.516      | 1.849      | 1.441      |
| $Co_1/Al_2O_3$ | 1.780      | 1.153      | 2.432      | 1.815      | 1.423      |
| $Ni_1/Al_2O_3$ | 1.798      | 1.148      | 2.385      | 1.891      | 1.450      |

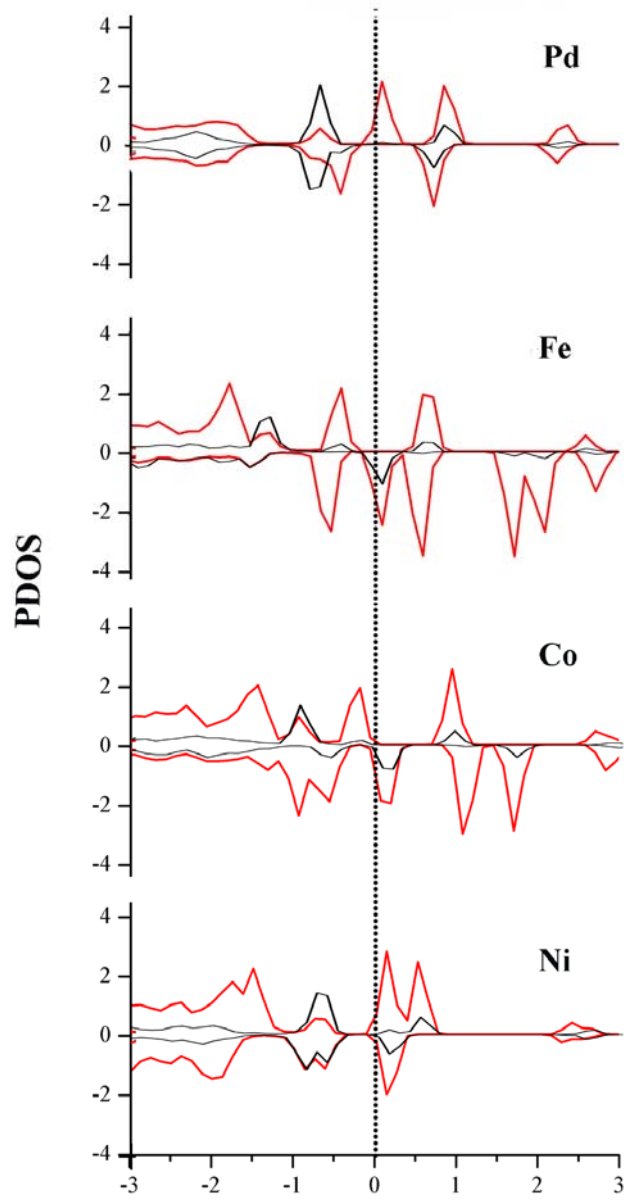

**Figure S11.** Calculated PDOS for O-*p* orbital (black) and M-*d* orbital (red) in intermediate **9** of  $M_1/Al_2O_3$  ( $M = Pd, Fe, Co$  and  $Ni$ ).
